# Supplementary material for: Complementary therapies for labour and birth study: a randomised controlled trial of antenatal integrative medicine for pain management in labour
Source: PubMed Central journal article supplement — BMJ Open. 2016 Jul 12;6(7):e010691. doi: 10.1136/bmjopen-2015-010691 (PMC4947718; doi:10.1136/bmjopen-2015-010691), 2016-07-12
Supplement: bmjopen-2015-010691supp_file2.pdf [file bmjopen-2015-010691supp_file2.pdf]

# Complementary Therapies for Labour and Birth Study

**POST PARTUM QUESTIONNAIRE: Labour Agency Scale**

**PATIENT INITIALS:** \_\_\_\_\_

**MRN:** \_\_\_\_\_

Version 1:10/10/11

## FEELINGS DURING CHILDBIRTH SCALE:

Please answer each question reflecting how you felt during your childbirth

|                                                                |                      |                          |                          |                          |                          |                          |                          |                          |               |
|----------------------------------------------------------------|----------------------|--------------------------|--------------------------|--------------------------|--------------------------|--------------------------|--------------------------|--------------------------|---------------|
| <b>1. I felt confident</b>                                     | <b>Almost always</b> | <input type="checkbox"/> | <b>Rarely</b> |
|                                                                |                      | 1                        | 2                        | 3                        | 4                        | 5                        | 6                        | 7                        |               |
| <b>2. I felt defeated</b>                                      | <b>Almost always</b> | <input type="checkbox"/> | <b>Rarely</b> |
|                                                                |                      | 1                        | 2                        | 3                        | 4                        | 5                        | 6                        | 7                        |               |
| <b>3. I felt important</b>                                     | <b>Almost always</b> | <input type="checkbox"/> | <b>Rarely</b> |
|                                                                |                      | 1                        | 2                        | 3                        | 4                        | 5                        | 6                        | 7                        |               |
| <b>4. I felt tense</b>                                         | <b>Almost always</b> | <input type="checkbox"/> | <b>Rarely</b> |
|                                                                |                      | 1                        | 2                        | 3                        | 4                        | 5                        | 6                        | 7                        |               |
| <b>5. I had a sense of understanding of what was happening</b> | <b>Almost always</b> | <input type="checkbox"/> | <b>Rarely</b> |
|                                                                |                      | 1                        | 2                        | 3                        | 4                        | 5                        | 6                        | 7                        |               |
| <b>6. I felt insecure</b>                                      | <b>Almost always</b> | <input type="checkbox"/> | <b>Rarely</b> |
|                                                                |                      | 1                        | 2                        | 3                        | 4                        | 5                        | 6                        | 7                        |               |
| <b>7. I felt relaxed</b>                                       | <b>Almost always</b> | <input type="checkbox"/> | <b>Rarely</b> |
|                                                                |                      | 1                        | 2                        | 3                        | 4                        | 5                        | 6                        | 7                        |               |
| <b>8. I felt competent</b>                                     | <b>Almost always</b> | <input type="checkbox"/> | <b>Rarely</b> |
|                                                                |                      | 1                        | 2                        | 3                        | 4                        | 5                        | 6                        | 7                        |               |
| <b>9. Someone or something else was in charge of my labour</b> | <b>Almost always</b> | <input type="checkbox"/> | <b>Rarely</b> |
|                                                                |                      | 1                        | 2                        | 3                        | 4                        | 5                        | 6                        | 7                        |               |
| <b>10. I felt inadequate</b>                                   | <b>Almost always</b> | <input type="checkbox"/> | <b>Rarely</b> |
|                                                                |                      | 1                        | 2                        | 3                        | 4                        | 5                        | 6                        | 7                        |               |

|                                                                 |               |                          |                          |                          |                          |                          |                          |        |
|-----------------------------------------------------------------|---------------|--------------------------|--------------------------|--------------------------|--------------------------|--------------------------|--------------------------|--------|
| 11. I experienced a sense of distress                           | Almost always | <input type="checkbox"/> | Rarely |
|                                                                 |               | 1                        | 2                        | 3                        | 4                        | 5                        | 6                        | 7      |
| 12. Everything seemed unclear and unreal                        | Almost always | <input type="checkbox"/> | Rarely |
|                                                                 |               | 1                        | 2                        | 3                        | 4                        | 5                        | 6                        | 7      |
| 13. I was completely aware of everything that was happening     | Almost always | <input type="checkbox"/> | Rarely |
|                                                                 |               | 1                        | 2                        | 3                        | 4                        | 5                        | 6                        | 7      |
| 14. I felt panicked                                             | Almost always | <input type="checkbox"/> | Rarely |
|                                                                 |               | 1                        | 2                        | 3                        | 4                        | 5                        | 6                        | 7      |
| 15. I felt like I was falling to pieces                         | Almost always | <input type="checkbox"/> | Rarely |
|                                                                 |               | 1                        | 2                        | 3                        | 4                        | 5                        | 6                        | 7      |
| 16. I had a feeling of constriction and of being confined       | Almost always | <input type="checkbox"/> | Rarely |
|                                                                 |               | 1                        | 2                        | 3                        | 4                        | 5                        | 6                        | 7      |
| 17. I was in control                                            | Almost always | <input type="checkbox"/> | Rarely |
|                                                                 |               | 1                        | 2                        | 3                        | 4                        | 5                        | 6                        | 7      |
| 18. I experienced a sense of being with others who care         | Almost always | <input type="checkbox"/> | Rarely |
|                                                                 |               | 1                        | 2                        | 3                        | 4                        | 5                        | 6                        | 7      |
| 19. Everything made sense                                       | Almost always | <input type="checkbox"/> | Rarely |
|                                                                 |               | 1                        | 2                        | 3                        | 4                        | 5                        | 6                        | 7      |
| 20. I felt like I was dying                                     | Almost always | <input type="checkbox"/> | Rarely |
|                                                                 |               | 1                        | 2                        | 3                        | 4                        | 5                        | 6                        | 7      |
| 21. I felt like I was doing everything I should have been doing | Almost always | <input type="checkbox"/> | Rarely |
|                                                                 |               | 1                        | 2                        | 3                        | 4                        | 5                        | 6                        | 7      |
| 22. I felt helpless                                             | Almost always | <input type="checkbox"/> | Rarely |
|                                                                 |               | 1                        | 2                        | 3                        | 4                        | 5                        | 6                        | 7      |
| 23. Everything seemed calm and peaceful                         | Almost always | <input type="checkbox"/> | Rarely |
|                                                                 |               | 1                        | 2                        | 3                        | 4                        | 5                        | 6                        | 7      |

|                                                        |                      |                          |                          |                          |                          |                          |                          |               |
|--------------------------------------------------------|----------------------|--------------------------|--------------------------|--------------------------|--------------------------|--------------------------|--------------------------|---------------|
| <b>24. I experienced a sense of success</b>            | <b>Almost always</b> | <input type="checkbox"/> | <b>Rarely</b> |
|                                                        |                      | <b>1</b>                 | <b>2</b>                 | <b>3</b>                 | <b>4</b>                 | <b>5</b>                 | <b>6</b>                 | <b>7</b>      |
| <b>25. I felt powerless</b>                            | <b>Almost always</b> | <input type="checkbox"/> | <b>Rarely</b> |
|                                                        |                      | <b>1</b>                 | <b>2</b>                 | <b>3</b>                 | <b>4</b>                 | <b>5</b>                 | <b>6</b>                 | <b>7</b>      |
| <b>26. I experienced a sense of failure</b>            | <b>Almost always</b> | <input type="checkbox"/> | <b>Rarely</b> |
|                                                        |                      | <b>1</b>                 | <b>2</b>                 | <b>3</b>                 | <b>4</b>                 | <b>5</b>                 | <b>6</b>                 | <b>7</b>      |
| <b>27. I was accepting of what was happening</b>       | <b>Almost always</b> | <input type="checkbox"/> | <b>Rarely</b> |
|                                                        |                      | <b>1</b>                 | <b>2</b>                 | <b>3</b>                 | <b>4</b>                 | <b>5</b>                 | <b>6</b>                 | <b>7</b>      |
| <b>28. I felt capable</b>                              | <b>Almost always</b> | <input type="checkbox"/> | <b>Rarely</b> |
|                                                        |                      | <b>1</b>                 | <b>2</b>                 | <b>3</b>                 | <b>4</b>                 | <b>5</b>                 | <b>6</b>                 | <b>7</b>      |
| <b>29. I felt bad about my behaviour during labour</b> | <b>Almost always</b> | <input type="checkbox"/> | <b>Rarely</b> |
|                                                        |                      | <b>1</b>                 | <b>2</b>                 | <b>3</b>                 | <b>4</b>                 | <b>5</b>                 | <b>6</b>                 | <b>7</b>      |
